# Supplementary material for: Antidepressant Prescribing in Primary Care to Older Adults Without Major Depression
Source: Atypon-hosted journal article supplement (doi:10.1176/appi.ps.201600197), 2017-01-03
Supplement: appi.ps.201600197.ds001.pdf [file appi.ps.201600197.ds001.pdf]

Appendix

eFigure 1. Study enrollment.

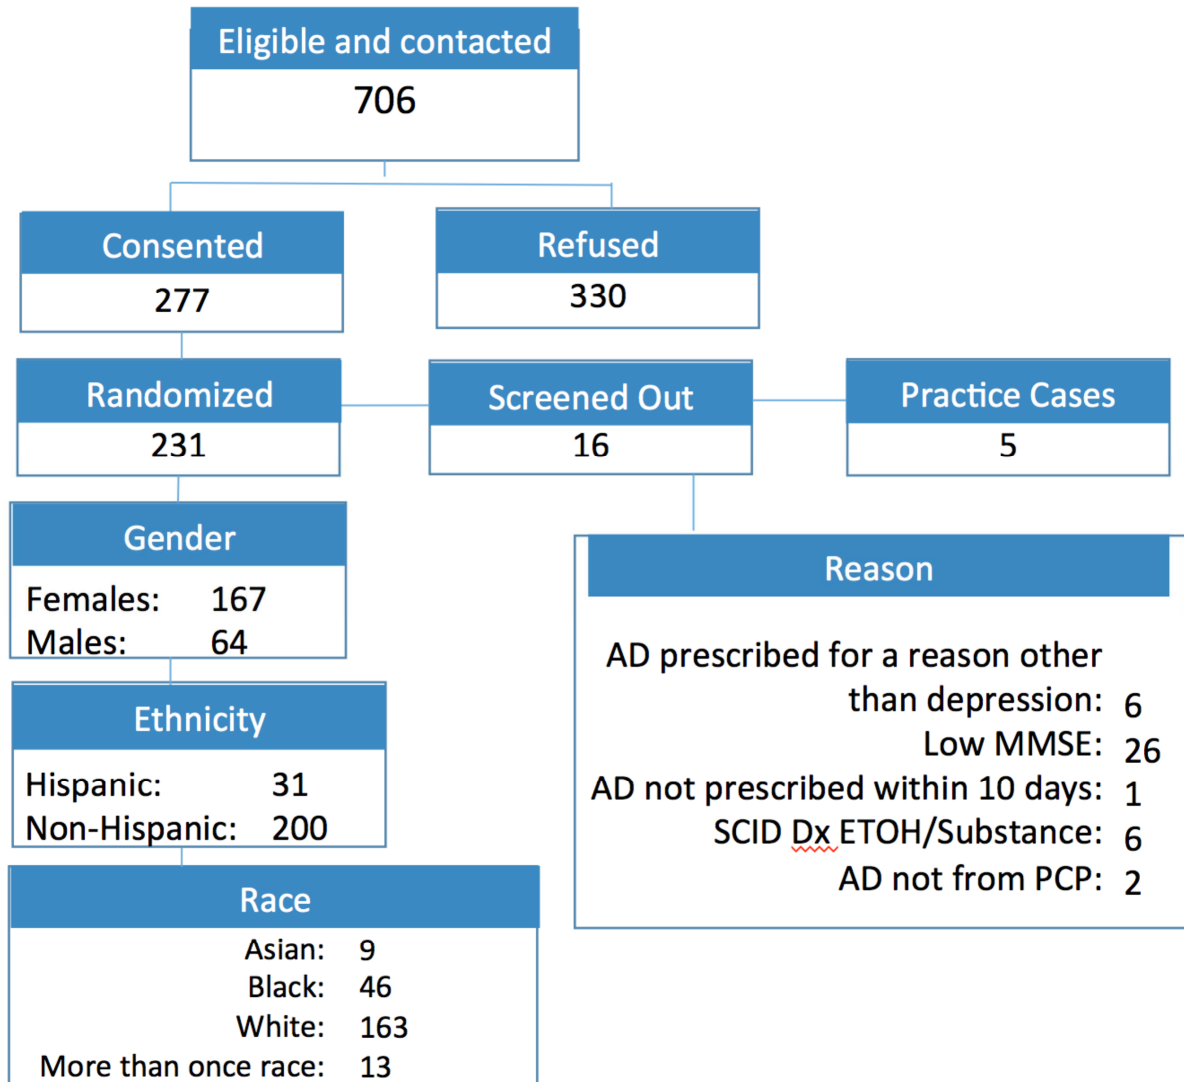

**eTable 1. Comparison of baseline characteristics of Treatment Initiation and Participation Program study participants by presence or absence of major depressive disorder (MDD) and site of recruitment.**

| Characteristics                                                  | Patients without MDD |    |                  |    |                  |    | Patients with MDD |                  |    |                  |    |                  |    |            |
|------------------------------------------------------------------|----------------------|----|------------------|----|------------------|----|-------------------|------------------|----|------------------|----|------------------|----|------------|
|                                                                  | Total<br>(N=131)     |    | Site 1<br>(N=37) |    | Site 2<br>(N=94) |    | P<br>value        | Total<br>(N=100) |    | Site 1<br>(N=77) |    | Site 2<br>(N=23) |    | P<br>value |
|                                                                  | N                    | %  | N                | %  | N                | %  |                   | N                | %  | N                | %  | N                | %  |            |
| Patient Health Questionnaire (PHQ-9) <sup>a</sup> (M±SD)         | 8.9± 4.8             |    | 9.0± 3.7         |    | 8.8± 5.2         |    | .83               | 17.1± 4.8        |    | 17.4± 4.9        |    | 16.3± 4.4        |    | .36        |
| Hamilton Depression Rating Scale <sup>b</sup> (M±SD)             | 12.8± 7.4            |    | 14.0± 5.6        |    | 12.3± 7.9        |    | .15               | 24.5± 7.6        |    | 24.6± 7.6        |    | 24.4± 8.0        |    | .93        |
| <b>DEMOGRAPHIC</b>                                               |                      |    |                  |    |                  |    |                   |                  |    |                  |    |                  |    |            |
| Age (M±SD)                                                       | 69.4± 9.1            |    | 68.0± 9.2        |    | 69.9± 9.1        |    | .29               | 64.7± 6.5        |    | 64.5± 6.7        |    | 65.4± 6.1        |    | .55        |
| 55-64                                                            | 47                   | 36 | 14               | 38 | 33               | 35 | .48               | 51               | 51 | 41               | 53 | 10               | 43 | .68        |
| 65-74                                                            | 46                   | 35 | 15               | 41 | 31               | 33 |                   | 39               | 39 | 29               | 38 | 10               | 43 |            |
| >=75                                                             | 38                   | 29 | 8                | 22 | 30               | 32 |                   | 10               | 10 | 7                | 9  | 3                | 13 |            |
| Gender                                                           |                      |    |                  |    |                  |    |                   |                  |    |                  |    |                  |    |            |
| Female                                                           | 91                   | 69 | 26               | 70 | 65               | 69 | .90               | 76               | 76 | 60               | 78 | 16               | 70 | .41        |
| Male                                                             | 40                   | 31 | 11               | 30 | 29               | 31 |                   | 24               | 24 | 17               | 22 | 7                | 30 |            |
| Race                                                             |                      |    |                  |    |                  |    |                   |                  |    |                  |    |                  |    |            |
| White                                                            | 107                  | 82 | 28               | 76 | 79               | 84 | .08               | 56               | 56 | 38               | 49 | 18               | 78 | .02        |
| Black                                                            | 16                   | 12 | 8                | 22 | 8                | 9  |                   | 30               | 30 | 25               | 32 | 5                | 22 |            |
| Other                                                            | 8                    | 6  | 1                | 3  | 7                | 7  |                   | 14               | 14 | 14               | 18 | 0                | 0  |            |
| Living alone                                                     | 39                   | 30 | 13               | 35 | 26               | 28 | .40               | 38               | 38 | 33               | 43 | 5                | 22 | .07        |
| Education                                                        |                      |    |                  |    |                  |    |                   |                  |    |                  |    |                  |    |            |
| < 12 years                                                       | 7                    | 5  | 2                | 5  | 5                | 5  | .94               | 11               | 11 | 10               | 13 | 1                | 4  | .36        |
| = 12 years                                                       | 29                   | 22 | 8                | 22 | 21               | 22 |                   | 22               | 22 | 18               | 23 | 4                | 17 |            |
| > 12 years                                                       | 94                   | 72 | 27               | 73 | 67               | 71 |                   | 67               | 67 | 49               | 64 | 18               | 78 |            |
| <b>CLINICAL</b>                                                  |                      |    |                  |    |                  |    |                   |                  |    |                  |    |                  |    |            |
| Chronic disease score <sup>c</sup> (M±SD)                        | 3.4± 2.8             |    | 3.8± 2.7         |    | 3.3± 2.8         |    | .41               | 3.8± 2.9         |    | 4.2± 2.9         |    | 2.8± 2.7         |    | .05        |
| Physical component summary of SF-12 (PCS) <sup>d</sup> (M±SD)    | 43.4±11.6            |    | 41.6±13.1        |    | 44.2±11.0        |    | .25               | 39.9±12.6        |    | 39.2±12.0        |    | 42.2±14.5        |    | .33        |
| Prior antidepressant use                                         | 72                   | 55 | 20               | 54 | 52               | 55 | .71               | 54               | 54 | 36               | 47 | 18               | 78 | .02        |
| Number of inpatient admissions and ED visits <sup>e</sup> (M±SD) | 67                   | 51 | 14               | 38 | 53               | 56 | .08               | 58               | 58 | 37               | 48 | 21               | 91 | < .001     |
| Number of outpatient                                             | .7± 5.4              |    | 1.9±10.0         |    | .3± 1.1          |    | .34               | 1.0± 7.0         |    | 1.1± 8.0         |    | .5± 1.2          |    | .53        |

|                                                                                       |           |           |           |        |           |           |           |      |
|---------------------------------------------------------------------------------------|-----------|-----------|-----------|--------|-----------|-----------|-----------|------|
| medical visits <sup>e</sup> (M±SD)                                                    |           |           |           |        |           |           |           |      |
| Number of support services <sup>e</sup> (M±SD)                                        | 2.5± 2.6  | 3.5± 4.2  | 2.1± 1.5  | .07    | 5.4±10.4  | 5.8±11.5  | 3.9± 5.5  | .27  |
| Number of minutes provider spent on discussion/education of antidepressant use (M±SD) | 1.9± 9.5  | 4.9±14.6  | .8± 6.2   | .11    | 7.9±21.5  | 9.9±24.0  | 1.4± 6.3  | .01  |
| <b>PSYCHOSOCIAL</b>                                                                   |           |           |           |        |           |           |           |      |
| Inventory of Interpersonal Problems <sup>f</sup> (M±SD)                               | 6.1± 7.6  | 2.4± 4.9  | 7.6± 8.0  | < .001 | 7.6±10.3  | 6.5±10.4  | 11.0± 9.4 | .07  |
| Anxiety Sensitivity Index-Revised <sup>g</sup> (M±SD)                                 | 11.4± 7.8 | 12.4± 9.0 | 11.0± 7.2 | .36    | 15.0± 8.0 | 15.0± 8.3 | 15.0± 7.0 | .995 |
| Perceived need                                                                        | 24.8±16.5 | 26.5±14.4 | 24.2±17.2 | .46    | 38.5±19.4 | 39.5±20.6 | 35.2±14.8 | .35  |
| Duke Social Support Index <sup>h</sup> (M±SD)                                         | 18.2± 2.7 | 17.5± 2.9 | 18.5± 2.6 | .06    | 16.2± 3.7 | 16.2± 3.6 | 16.4± 4.1 | .82  |
| Beck Hopelessness <sup>i</sup> (M±SD)                                                 | 2.0± 2.2  | 2.1± 1.8  | 1.9± 2.3  | .80    | 3.2± 3.0  | 3.0± 2.9  | 3.8± 3.1  | .24  |
| General Self-Efficacy <sup>j</sup> (M±SD)                                             | 30.0± 4.3 | 28.9± 4.4 | 30.4± 4.2 | .07    | 27.1± 7.4 | 27.9± 6.6 | 24.6± 9.4 | .13  |
| Mental Component Summary of SF-12 (MCS) <sup>d</sup> (M±SD)                           | 40.2± 9.8 | 39.6± 8.4 | 40.4±10.3 | .64    | 30.5± 7.5 | 30.9± 7.5 | 29.0± 7.4 | .28  |

<sup>a</sup> Possible scores on the 9-item PHQ-9 range from 0 to 27, with higher scores indicating greater depression.

<sup>b</sup> Possible scores on the Hamilton Depression Rating Scale range from 0 to 30, with higher scores indicating greater depression.

<sup>c</sup> Possible scores on the revised Chronic disease score range from 0 to 13, with higher scores indicating more chronic diseases.

<sup>d</sup> Possible component summary scores on the 12-item Short-Form Health Survey (SF-12) range from 0 to 100, with a population mean of 50 and higher scores indicating a greater health.

<sup>e</sup> Refers to number of encounters/services used in past 90 days; support services includes nursing service, personal home aide, home meal service, physical/occupational therapy, transportation assistance.

<sup>f</sup> Possible scores on the Inventory of Interpersonal Problems range from 0 to 40, with higher scores indicating greater interpersonal problems.

<sup>g</sup> Possible scores on the Anxiety Sensitivity Index–Revised (ASI-R) range from 0 to 80, with higher scores indicating greater fear about somatic anxiety symptoms.

<sup>h</sup> Possible scores on the Duke social support index range from 7 to 21, with higher scores indicating greater social support.

<sup>i</sup> Possible scores on the Beck hopelessness scale range from 0 to 10, with higher scores indicating greater sense of hopelessness.

<sup>j</sup> Possible scores on the General self-efficacy range from 10 to 40, with higher scores indicating better self-efficacy.
